# Supplementary material for: [Na4(N5)4(H2O)2]·H2O·2MeOH: a honeycomb-like sodium pentazolate framework with helical chains
Source: Royal Society of Chemistry journal article supplement (doi:10.1039/d2ce00713d), 2022-01-01
Supplement: d2ce00713d1.pdf [file d2ce00713d1.pdf]

## **Electronic Supplementary Information**

### **[Na<sub>4</sub>(N<sub>5</sub>)<sub>4</sub>(H<sub>2</sub>O)<sub>2</sub>]·H<sub>2</sub>O·2MeOH: a honeycomb-like sodium-pentazolate-framework with helical chains**

Yuangang Xu,<sup>‡\*</sup> Ze Xu,<sup>‡</sup> Xiaopeng Zhang, Tianyang Hou and Ming Lu\*

School of Chemistry and Chemical Engineering, Nanjing University of Science and  
Technology, Nanjing 210094, Jiangsu, China

E-mail: *yuangangxu@163.com; luming@njust.edu.cn*

## **Table of Contents**

|    |                                                           |     |
|----|-----------------------------------------------------------|-----|
| 1. | Single-crystal X-ray diffraction analysis of framework 1  | S3  |
| 2. | IR spectra                                                | S8  |
| 3. | Experimental section PXRD patterns of framework 1         | S9  |
| 4. | Experimental section                                      | S9  |
| 5. | The theoretical simulation of the porosity of framework 1 | S10 |
| 6. | References                                                | S12 |

# 1. Single-crystal X-ray diffraction analysis of framework 1

**Table S1.** Crystal data, data collection, and refinement for framework 1

|                                                                                                                                                                                                                                                                                      |                                                                                                                                                       |
|--------------------------------------------------------------------------------------------------------------------------------------------------------------------------------------------------------------------------------------------------------------------------------------|-------------------------------------------------------------------------------------------------------------------------------------------------------|
| $\text{H}_2\text{N}_{10}\text{Na}_2\text{O}\cdot 0.5(\text{H}_2\text{O})\cdot \text{CH}_4\text{O}$                                                                                                                                                                                   | $D_x = 1.614 \text{ Mg m}^{-3}$                                                                                                                       |
| $M_r = 245.15$                                                                                                                                                                                                                                                                       | Mo $K\alpha$ radiation, $\lambda = 0.71073 \text{ \AA}$                                                                                               |
| Trigonal, $P3_221$                                                                                                                                                                                                                                                                   | Cell parameters from 9535 reflections                                                                                                                 |
| $a = 9.6556 (6) \text{ \AA}$                                                                                                                                                                                                                                                         | $\theta = 2.7\text{--}27.5^\circ$                                                                                                                     |
| $c = 18.7426 (9) \text{ \AA}$                                                                                                                                                                                                                                                        | $\mu = 0.21 \text{ mm}^{-1}$                                                                                                                          |
| $V = 1513.3 (2) \text{ \AA}^3$                                                                                                                                                                                                                                                       | $T = 100 \text{ K}$                                                                                                                                   |
| $Z = 6$                                                                                                                                                                                                                                                                              | Needle, colourless                                                                                                                                    |
| $F(000) = 750$                                                                                                                                                                                                                                                                       | $0.08 \times 0.05 \times 0.04 \text{ mm}$                                                                                                             |
| Bruker APEX-II CCD diffractometer                                                                                                                                                                                                                                                    | 2143 reflections with $I > 2\sigma(I)$                                                                                                                |
| $\phi$ and $\omega$ scans                                                                                                                                                                                                                                                            | $R_{\text{int}} = 0.081$                                                                                                                              |
| Absorption correction: multi-scan <i>SADABS2016/2</i> (Bruker,2016/2) was used for absorption correction. $wR2(\text{int})$ was 0.1717 before and 0.1205 after correction. The Ratio of minimum to maximum transmission is 0.8579. The $\lambda/2$ correction factor is Not present. | $\theta_{\text{max}} = 27.5^\circ$ , $\theta_{\text{min}} = 2.7^\circ$                                                                                |
| $T_{\text{min}} = 0.549$ , $T_{\text{max}} = 0.640$                                                                                                                                                                                                                                  | $h = -12 \rightarrow 12$                                                                                                                              |
| 12964 measured reflections                                                                                                                                                                                                                                                           | $k = -12 \rightarrow 12$                                                                                                                              |
| 2285 independent reflections                                                                                                                                                                                                                                                         | $l = -24 \rightarrow 22$                                                                                                                              |
| Refinement on $F^2$                                                                                                                                                                                                                                                                  | Hydrogen site location: mixed                                                                                                                         |
| Least-squares matrix: full                                                                                                                                                                                                                                                           | H-atom parameters constrained                                                                                                                         |
| $R[F^2 > 2\sigma(F^2)] = 0.055$                                                                                                                                                                                                                                                      | $w = 1/[\sigma^2(F_o^2) + (0.097P)^2]$<br>where $P = (F_o^2 + 2F_c^2)/3$                                                                              |
| $wR(F^2) = 0.144$                                                                                                                                                                                                                                                                    | $(\Delta/\sigma)_{\text{max}} < 0.001$                                                                                                                |
| $S = 1.05$                                                                                                                                                                                                                                                                           | $\Delta_{\text{max}} = 0.55 \text{ e \AA}^{-3}$                                                                                                       |
| 2285 reflections                                                                                                                                                                                                                                                                     | $\Delta_{\text{min}} = -0.38 \text{ e \AA}^{-3}$                                                                                                      |
| 147 parameters                                                                                                                                                                                                                                                                       | Absolute structure: Flack x determined using 793 quotients $[(I^+)-(I^-)]/[(I^+)+(I^-)]$ (Parsons, Flack and Wagner, Acta Cryst. B69 (2013) 249-259). |
| 4 restraints                                                                                                                                                                                                                                                                         | Absolute structure parameter: -0.2 (2)                                                                                                                |
| Primary atom site location: dual                                                                                                                                                                                                                                                     |                                                                                                                                                       |

**Table S2.** Fractional atomic coordinates and isotropic or equivalent isotropic displacement parameters ( $\text{\AA}^2$ ) for framework 1

|     | $x$        | $y$        | $z$          | $U_{\text{iso}}^*/U_{\text{eq}}$ | Occ. (<1) |
|-----|------------|------------|--------------|----------------------------------|-----------|
| Na2 | 0.2518 (2) | 0.4756 (2) | 0.78806 (10) | 0.0083 (4)                       |           |

|     |              |             |              |             |     |
|-----|--------------|-------------|--------------|-------------|-----|
| Na1 | 0.2012 (2)   | 0.7469 (2)  | 0.62081 (11) | 0.0093 (4)  |     |
| N3  | -0.2473 (5)  | 0.3349 (6)  | 0.7082 (3)   | 0.0130 (8)  |     |
| N2  | -0.1516 (5)  | 0.3222 (5)  | 0.7551 (2)   | 0.0127 (9)  |     |
| N10 | 0.4649 (5)   | 1.1450 (5)  | 0.5869 (2)   | 0.0120 (9)  |     |
| N9  | 0.5777 (5)   | 1.2356 (5)  | 0.5416 (3)   | 0.0136 (8)  |     |
| N5  | -0.0076 (5)  | 0.5107 (5)  | 0.6823 (2)   | 0.0120 (9)  |     |
| N4  | -0.1574 (5)  | 0.4516 (5)  | 0.6627 (2)   | 0.0119 (8)  |     |
| N7  | 0.4907 (6)   | 0.9918 (5)  | 0.5127 (2)   | 0.0119 (9)  |     |
| O1  | 0.1970 (5)   | 0.2031 (5)  | 0.7668 (2)   | 0.0178 (7)  |     |
| H1A | 0.175721     | 0.131776    | 0.798675     | 0.021*      |     |
| H1B | 0.114791     | 0.167106    | 0.737155     | 0.021*      |     |
| O3  | -0.3215 (6)  | 0.000000    | 0.666667     | 0.0323 (14) |     |
| H3A | -0.422032    | -0.075946   | 0.671768     | 0.049*      | 0.5 |
| H3B | -0.310868    | 0.073601    | 0.695990     | 0.049*      | 0.5 |
| N8  | 0.5956 (5)   | 1.1418 (5)  | 0.4949 (2)   | 0.0114 (8)  |     |
| N1  | -0.0024 (5)  | 0.4311 (5)  | 0.7390 (2)   | 0.0110 (9)  |     |
| N6  | 0.4099 (5)   | 0.9930 (5)  | 0.5694 (2)   | 0.0125 (9)  |     |
| O2  | -0.1306 (6)  | -0.0538 (6) | 0.7606 (2)   | 0.0335 (11) |     |
| H2  | -0.211088    | -0.053055   | 0.743972     | 0.050*      |     |
| C1  | -0.1420 (12) | -0.2014 (9) | 0.7459 (4)   | 0.0433 (19) |     |
| H1C | -0.192614    | -0.274037   | 0.786261     | 0.065*      |     |
| H1D | -0.034691    | -0.185860   | 0.738264     | 0.065*      |     |
| H1E | -0.206600    | -0.247706   | 0.702853     | 0.065*      |     |

**Table S3.** Atomic displacement parameters ( $\text{\AA}^2$ ) for framework **1**

|     | $U^{11}$    | $U^{22}$    | $U^{33}$    | $U^{12}$    | $U^{13}$     | $U^{23}$     |
|-----|-------------|-------------|-------------|-------------|--------------|--------------|
| Na2 | 0.0085 (9)  | 0.0106 (9)  | 0.0070 (7)  | 0.0058 (7)  | 0.0003 (7)   | 0.0006 (7)   |
| Na1 | 0.0086 (9)  | 0.0073 (9)  | 0.0089 (8)  | 0.0018 (8)  | 0.0010 (8)   | 0.0000 (7)   |
| N3  | 0.0091 (18) | 0.014 (2)   | 0.0119 (18) | 0.0029 (17) | -0.0024 (19) | 0.0053 (18)  |
| N2  | 0.010 (2)   | 0.012 (2)   | 0.012 (2)   | 0.0025 (17) | 0.0015 (17)  | 0.0048 (17)  |
| N10 | 0.014 (2)   | 0.0092 (19) | 0.011 (2)   | 0.0050 (17) | 0.0020 (18)  | -0.0020 (17) |
| N9  | 0.015 (2)   | 0.0099 (18) | 0.0124 (18) | 0.0039 (17) | 0.006 (2)    | 0.002 (2)    |
| N5  | 0.0098 (18) | 0.011 (2)   | 0.012 (2)   | 0.0029 (17) | -0.0023 (16) | 0.0010 (17)  |
| N4  | 0.0082 (19) | 0.0134 (19) | 0.0105 (19) | 0.0028 (17) | -0.0013 (15) | 0.0031 (17)  |
| N7  | 0.017 (2)   | 0.0057 (17) | 0.011 (2)   | 0.0042 (16) | 0.0039 (16)  | 0.0024 (16)  |
| O1  | 0.0147 (17) | 0.0112 (17) | 0.0250 (14) | 0.0045 (15) | 0.0000 (16)  | 0.0017 (16)  |
| O3  | 0.028 (2)   | 0.023 (3)   | 0.044 (3)   | 0.0115 (16) | -0.0055 (15) | -0.011 (3)   |
| N8  | 0.013 (2)   | 0.0075 (18) | 0.0101 (19) | 0.0029 (16) | 0.0039 (17)  | 0.0015 (14)  |

|    |             |             |             |             |              |             |
|----|-------------|-------------|-------------|-------------|--------------|-------------|
| N1 | 0.0081 (19) | 0.012 (2)   | 0.0103 (18) | 0.0035 (17) | -0.0011 (17) | 0.0029 (16) |
| N6 | 0.011 (2)   | 0.0094 (19) | 0.014 (2)   | 0.0032 (17) | 0.0019 (16)  | 0.0018 (18) |
| O2 | 0.030 (2)   | 0.038 (3)   | 0.033 (2)   | 0.016 (2)   | -0.0006 (19) | -0.004 (2)  |
| C1 | 0.056 (5)   | 0.034 (4)   | 0.030 (4)   | 0.016 (4)   | -0.003 (3)   | -0.008 (3)  |

**Table S4.** Geometric parameters (Å, °) for framework **1**

|                                         |             |                           |            |
|-----------------------------------------|-------------|---------------------------|------------|
| Na2—Na1 <sup>i</sup>                    | 3.827 (3)   | N10—N6                    | 1.328 (6)  |
| Na2—N2 <sup>ii</sup>                    | 2.505 (5)   | N9—N8                     | 1.332 (6)  |
| Na2—N9 <sup>iii</sup>                   | 2.471 (5)   | N5—N4                     | 1.315 (6)  |
| Na2—N4 <sup>i</sup>                     | 2.489 (5)   | N5—N1                     | 1.326 (6)  |
| Na2—N7 <sup>iv</sup>                    | 2.509 (5)   | N7—N8                     | 1.331 (6)  |
| Na2—O1                                  | 2.443 (4)   | N7—N6                     | 1.321 (6)  |
| Na2—N1                                  | 2.449 (5)   | O1—H1A                    | 0.8551     |
| Na1—N3 <sup>i</sup>                     | 2.580 (5)   | O1—H1B                    | 0.8856     |
| Na1—N10 <sup>iii</sup>                  | 2.598 (5)   | O3—H3A                    | 0.8815     |
| Na1—N5                                  | 2.448 (5)   | O3—H3A <sup>vii</sup>     | 0.88 (16)  |
| Na1—O1 <sup>v</sup>                     | 2.498 (4)   | O3—H3B <sup>vii</sup>     | 0.86 (6)   |
| Na1—N8 <sup>vi</sup>                    | 2.515 (5)   | O3—H3B                    | 0.8629     |
| Na1—N6                                  | 2.419 (5)   | O2—H2                     | 0.8400     |
| N3—N2                                   | 1.326 (6)   | O2—C1                     | 1.402 (10) |
| N3—N4                                   | 1.332 (6)   | C1—H1C                    | 0.9800     |
| N2—N1                                   | 1.326 (6)   | C1—H1D                    | 0.9800     |
| N10—N9                                  | 1.311 (6)   | C1—H1E                    | 0.9800     |
|                                         |             |                           |            |
| N2 <sup>ii</sup> —Na2—Na1 <sup>i</sup>  | 129.92 (12) | N3—N2—N1                  | 107.8 (4)  |
| N2 <sup>ii</sup> —Na2—N7 <sup>iv</sup>  | 86.72 (15)  | N1—N2—Na2 <sup>ii</sup>   | 124.9 (3)  |
| N9 <sup>iii</sup> —Na2—Na1 <sup>i</sup> | 130.75 (14) | N9—N10—Na1 <sup>iii</sup> | 120.3 (3)  |
| N9 <sup>iii</sup> —Na2—N2 <sup>ii</sup> | 84.24 (16)  | N9—N10—N6                 | 108.4 (4)  |
| N9 <sup>iii</sup> —Na2—N4 <sup>i</sup>  | 82.53 (16)  | N6—N10—Na1 <sup>iii</sup> | 126.5 (3)  |
| N9 <sup>iii</sup> —Na2—N7 <sup>iv</sup> | 93.87 (16)  | N10—N9—Na2 <sup>iii</sup> | 130.7 (3)  |
| N4 <sup>i</sup> —Na2—Na1 <sup>i</sup>   | 58.41 (11)  | N10—N9—N8                 | 108.6 (4)  |
| N4 <sup>i</sup> —Na2—N2 <sup>ii</sup>   | 166.10 (17) | N8—N9—Na2 <sup>iii</sup>  | 119.6 (3)  |
| N4 <sup>i</sup> —Na2—N7 <sup>iv</sup>   | 89.93 (15)  | N4—N5—Na1                 | 119.1 (3)  |
| N7 <sup>iv</sup> —Na2—Na1 <sup>i</sup>  | 60.45 (11)  | N4—N5—N1                  | 109.0 (4)  |
| O1—Na2—Na1 <sup>i</sup>                 | 39.77 (10)  | N1—N5—Na1                 | 131.7 (3)  |
| O1—Na2—N2 <sup>ii</sup>                 | 105.53 (16) | N3—N4—Na2 <sup>v</sup>    | 130.9 (3)  |
| O1—Na2—N9 <sup>iii</sup>                | 169.68 (18) | N5—N4—Na2 <sup>v</sup>    | 120.5 (3)  |
| O1—Na2—N4 <sup>i</sup>                  | 87.47 (14)  | N5—N4—N3                  | 107.3 (4)  |

|                                              |             |                                           |             |
|----------------------------------------------|-------------|-------------------------------------------|-------------|
| O1—Na2—N7 <sup>iv</sup>                      | 83.53 (15)  | N8—N7—Na2 <sup>viii</sup>                 | 116.8 (3)   |
| O1—Na2—N1                                    | 95.24 (15)  | N6—N7—Na2 <sup>viii</sup>                 | 132.7 (3)   |
| N1—Na2—Na1 <sup>i</sup>                      | 120.72 (12) | N6—N7—N8                                  | 108.9 (4)   |
| N1—Na2—N2 <sup>ii</sup>                      | 89.79 (15)  | Na2—O1—Na1 <sup>i</sup>                   | 101.49 (16) |
| N1—Na2—N9 <sup>iii</sup>                     | 88.03 (15)  | Na2—O1—H1A                                | 126.1       |
| N1—Na2—N4 <sup>i</sup>                       | 93.99 (15)  | Na2—O1—H1B                                | 101.2       |
| N1—Na2—N7 <sup>iv</sup>                      | 175.84 (16) | Na1 <sup>i</sup> —O1—H1A                  | 104.8       |
| N3 <sup>i</sup> —Na1—Na2 <sup>v</sup>        | 130.22 (13) | Na1 <sup>i</sup> —O1—H1B                  | 115.4       |
| N3 <sup>i</sup> —Na1—N10 <sup>iii</sup>      | 80.32 (16)  | H1A—O1—H1B                                | 108.4       |
| N10 <sup>iii</sup> —Na1—Na2 <sup>v</sup>     | 134.01 (12) | H3A—O3—H3A <sup>vii</sup>                 | 93.5        |
| N5—Na1—Na2 <sup>v</sup>                      | 59.94 (11)  | H3A—O3—H3B                                | 104.1       |
| N5—Na1—N3 <sup>i</sup>                       | 96.65 (16)  | H3A <sup>vii</sup> —O3—H3B <sup>vii</sup> | 104.1       |
| N5—Na1—N10 <sup>iii</sup>                    | 86.56 (14)  | H3A—O3—H3B <sup>vii</sup>                 | 49.8        |
| N5—Na1—O1 <sup>v</sup>                       | 90.35 (15)  | H3B—O3—H3A <sup>vii</sup>                 | 49.8        |
| N5—Na1—N8 <sup>vi</sup>                      | 91.31 (15)  | H3B—O3—H3B <sup>vii</sup>                 | 146.0       |
| O1 <sup>v</sup> —Na1—Na2 <sup>v</sup>        | 38.74 (10)  | N9—N8—Na1 <sup>ix</sup>                   | 132.1 (3)   |
| O1 <sup>v</sup> —Na1—N3 <sup>i</sup>         | 157.28 (17) | N7—N8—Na1 <sup>ix</sup>                   | 120.3 (3)   |
| O1 <sup>v</sup> —Na1—N10 <sup>iii</sup>      | 121.79 (15) | N7—N8—N9                                  | 106.7 (4)   |
| O1 <sup>v</sup> —Na1—N8 <sup>vi</sup>        | 77.83 (14)  | N2—N1—Na2                                 | 130.5 (3)   |
| N8 <sup>vi</sup> —Na1—Na2 <sup>v</sup>       | 59.08 (11)  | N2—N1—N5                                  | 107.5 (4)   |
| N8 <sup>vi</sup> —Na1—N3 <sup>i</sup>        | 80.42 (16)  | N5—N1—Na2                                 | 121.6 (3)   |
| N8 <sup>vi</sup> —Na1—N10 <sup>iii</sup>     | 160.24 (16) | N10—N6—Na1                                | 131.5 (3)   |
| N6—Na1—Na2 <sup>v</sup>                      | 122.49 (12) | N7—N6—Na1                                 | 121.1 (3)   |
| N6—Na1—N3 <sup>i</sup>                       | 84.74 (15)  | N7—N6—N10                                 | 107.3 (4)   |
| N6—Na1—N10 <sup>iii</sup>                    | 89.01 (15)  | C1—O2—H2                                  | 109.5       |
| N6—Na1—N5                                    | 175.06 (17) | O2—C1—H1C                                 | 109.5       |
| N6—Na1—O1 <sup>v</sup>                       | 90.13 (14)  | O2—C1—H1D                                 | 109.5       |
| N6—Na1—N8 <sup>vi</sup>                      | 93.60 (15)  | O2—C1—H1E                                 | 109.5       |
| N2—N3—Na1 <sup>v</sup>                       | 132.4 (3)   | H1C—C1—H1D                                | 109.5       |
| N2—N3—N4                                     | 108.3 (4)   | H1C—C1—H1E                                | 109.5       |
| N4—N3—Na1 <sup>v</sup>                       | 115.8 (3)   | H1D—C1—H1E                                | 109.5       |
| N3—N2—Na2 <sup>ii</sup>                      | 119.5 (3)   |                                           |             |
|                                              |             |                                           |             |
| Na2 <sup>ii</sup> —N2—N1—Na2                 | 38.4 (6)    | N3—N2—N1—Na2                              | -172.7 (3)  |
| Na2 <sup>ii</sup> —N2—N1—N5                  | -148.6 (3)  | N3—N2—N1—N5                               | 0.3 (5)     |
| Na2 <sup>iii</sup> —N9—N8—Na1 <sup>ix</sup>  | -21.9 (6)   | N2—N3—N4—Na2 <sup>v</sup>                 | 166.2 (3)   |
| Na2 <sup>iii</sup> —N9—N8—N7                 | 169.3 (3)   | N2—N3—N4—N5                               | -0.6 (6)    |
| Na2 <sup>viii</sup> —N7—N8—Na1 <sup>ix</sup> | 22.4 (5)    | N10—N9—N8—Na1 <sup>ix</sup>               | 168.9 (4)   |
| Na2 <sup>viii</sup> —N7—N8—N9                | -167.3 (3)  | N10—N9—N8—N7                              | 0.2 (6)     |

|                                               |            |                              |            |
|-----------------------------------------------|------------|------------------------------|------------|
| Na2 <sup>viii</sup> —N7—N6—Na1                | -16.7 (6)  | N9—N10—N6—Na1                | -178.7 (3) |
| Na2 <sup>viii</sup> —N7—N6—N10                | 164.3 (4)  | N9—N10—N6—N7                 | 0.1 (6)    |
| Na1 <sup>v</sup> —N3—N2—Na2 <sup>ii</sup>     | -6.3 (6)   | N4—N3—N2—Na2 <sup>ii</sup>   | 151.0 (3)  |
| Na1 <sup>v</sup> —N3—N2—N1                    | -157.1 (4) | N4—N3—N2—N1                  | 0.2 (6)    |
| Na1 <sup>v</sup> —N3—N4—Na2 <sup>v</sup>      | -32.2 (6)  | N4—N5—N1—Na2                 | 173.1 (3)  |
| Na1 <sup>v</sup> —N3—N4—N5                    | 160.9 (3)  | N4—N5—N1—N2                  | -0.7 (5)   |
| Na1 <sup>iii</sup> —N10—N9—Na2 <sup>iii</sup> | -10.6 (6)  | N8—N7—N6—Na1                 | 179.0 (3)  |
| Na1 <sup>iii</sup> —N10—N9—N8                 | 156.9 (3)  | N8—N7—N6—N10                 | 0.0 (5)    |
| Na1 <sup>iii</sup> —N10—N6—Na1                | 26.0 (6)   | N1—N5—N4—Na2 <sup>v</sup>    | -167.6 (3) |
| Na1 <sup>iii</sup> —N10—N6—N7                 | -155.3 (3) | N1—N5—N4—N3                  | 0.9 (6)    |
| Na1—N5—N4—Na2 <sup>v</sup>                    | 17.3 (5)   | N6—N10—N9—Na2 <sup>iii</sup> | -167.7 (3) |
| Na1—N5—N4—N3                                  | -174.2 (3) | N6—N10—N9—N8                 | -0.2 (6)   |
| Na1—N5—N1—Na2                                 | -12.7 (6)  | N6—N7—N8—Na1 <sup>ix</sup>   | -170.5 (3) |
| Na1—N5—N1—N2                                  | 173.5 (4)  | N6—N7—N8—N9                  | -0.1 (6)   |

Symmetry codes: (i)  $x-y+1, -y+1, -z+4/3$ ; (ii)  $-x, -x+y, -z+5/3$ ; (iii)  $x-y+1, -y+2, -z+4/3$ ; (iv)  $-x+y, -x+1, z+1/3$ ; (v)  $x-y, -y+1, -z+4/3$ ; (vi)  $y-1, x, -z+1$ ; (vii)  $x-y, -y, -z+4/3$ ; (viii)  $-y+1, x-y+1, z-1/3$ ; (ix)  $y, x+1, -z+1$ .

**Table S5.** Hydrogen bonds (Å, °) for framework **1**

| $D-H\cdots A$                    | $D-H$ | $H\cdots A$ | $D\cdots A$ | $D-H\cdots A$ |
|----------------------------------|-------|-------------|-------------|---------------|
| O1—H1A $\cdots$ O2 <sup>ii</sup> | 0.86  | 2.07        | 2.816 (6)   | 145           |
| O1—H1B $\cdots$ O2               | 0.89  | 2.30        | 2.885 (6)   | 123           |
| O2—H2 $\cdots$ O3                | 0.84  | 2.01        | 2.779 (7)   | 152           |
| O3—H3A $\cdots$ N3               | 0.88  | 2.35        | 3.043(6)    | 135           |
| O3—H3B $\cdots$ N2               | 0.86  | 2.38        | 3.164(4)    | 151           |
| O3—H3B $\cdots$ N3               | 0.86  | 2.29        | 3.043(5)    | 146           |

Symmetry code: (ii)  $-x, -x+y, -z+5/3$ .

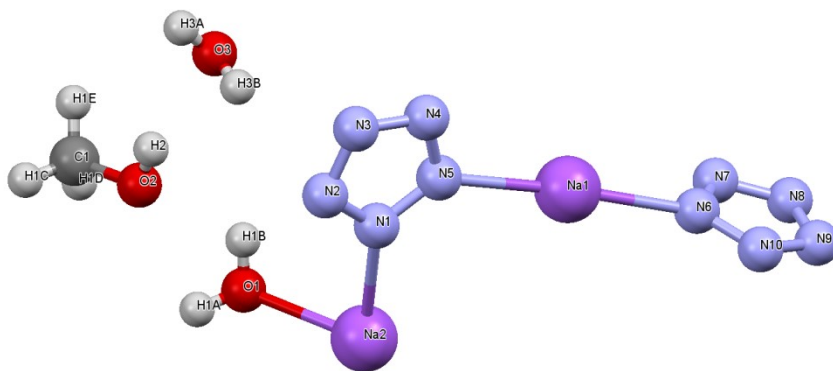

**Fig. S1** The asymmetric unit of framework **1**.

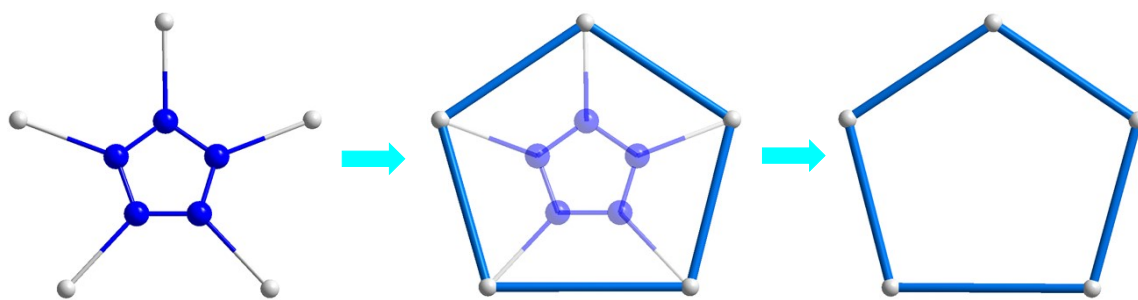

**Fig. S2** Simplify the  $\text{Na}_5\text{N}_5$  building unit into an enlarged pentagon.

## 2. IR spectra

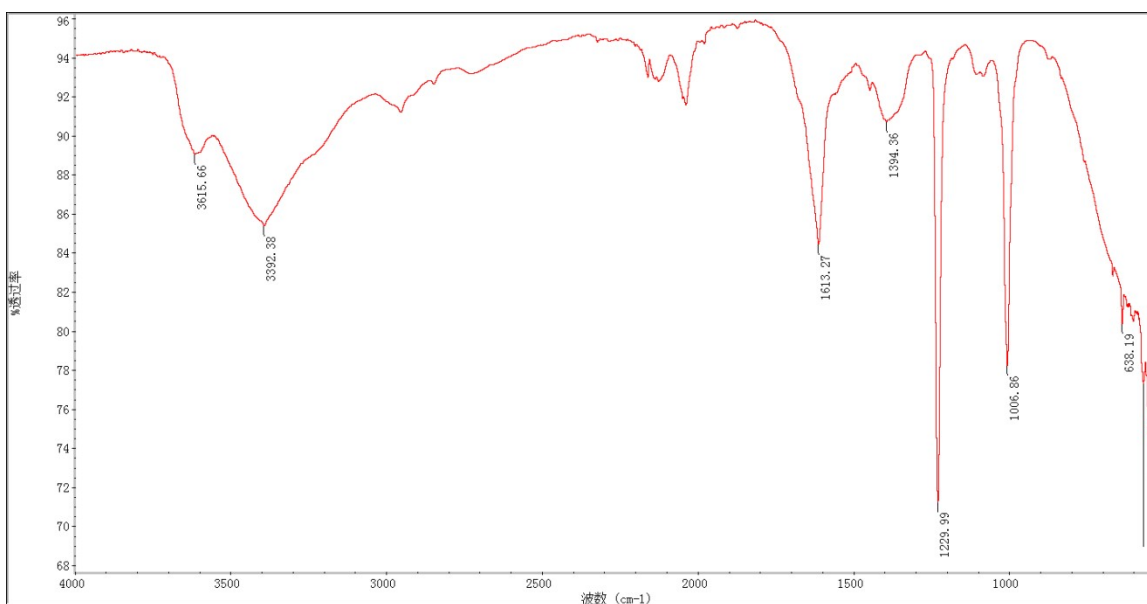

**Fig. S3** The IR spectrum of framework 1.

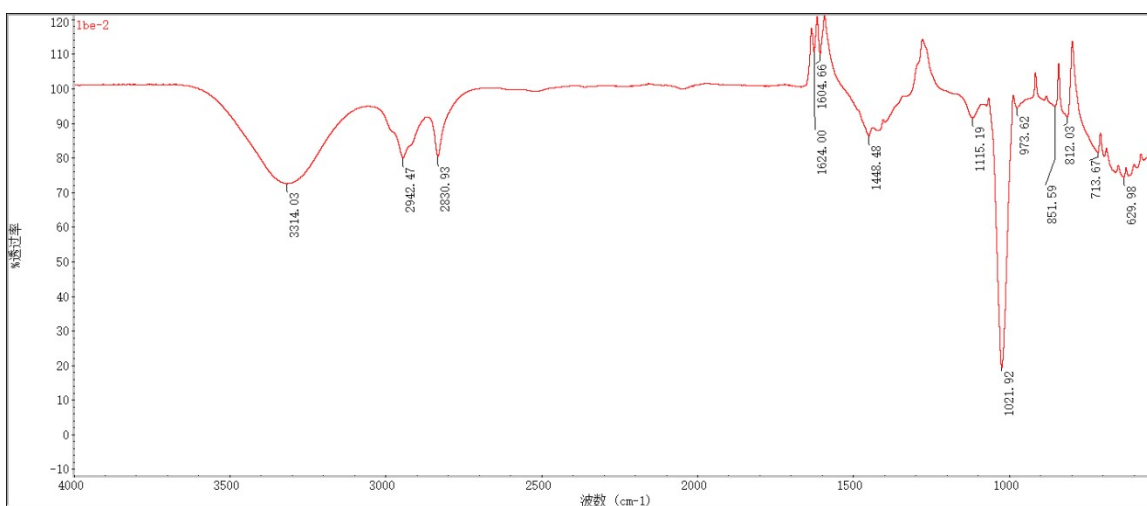

**Fig. S4** The IR spectrum of MeOH.



### 3. PXRD patterns of framework 1

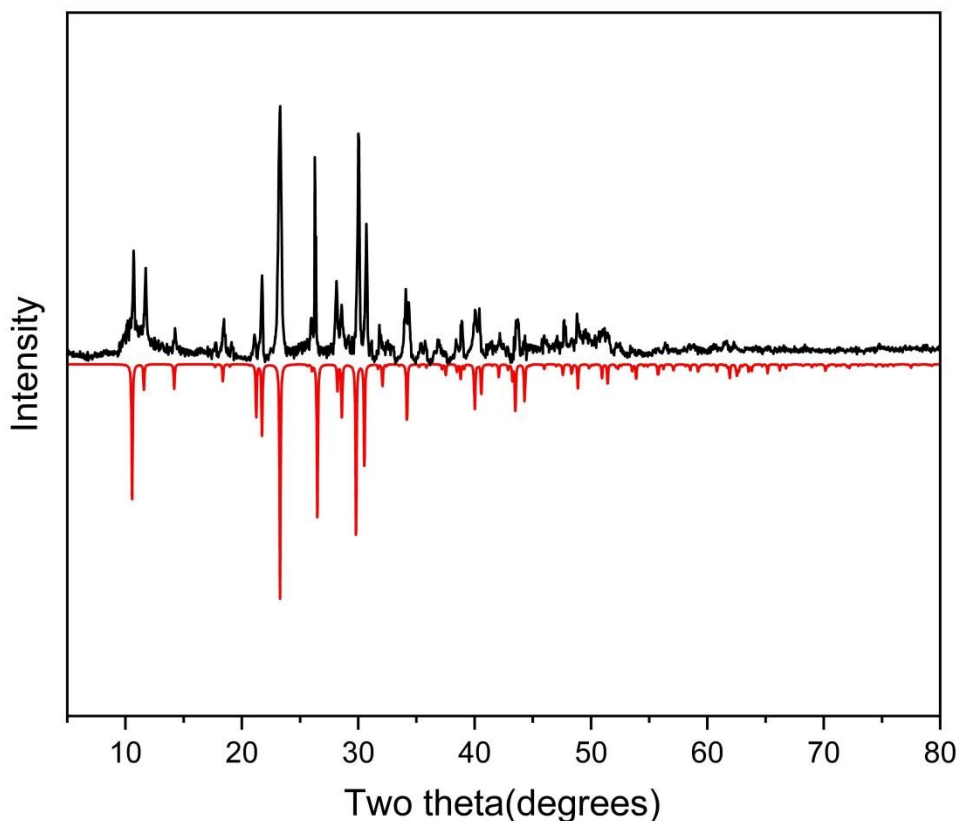

**Fig. S5** The PXRD pattern (in black) of framework 1 and the calculated pattern (in red) from its single-crystal structure

### 4. Experimental section

#### 4.1 Caution

Although no explosion or hazards were observed during the preparation and handling of these energetic compounds, all the materials investigated are potentially energetic materials. Small-scale syntheses are strongly encouraged. Manipulations must be carried out in a hood behind a safety shield. Eye protection and leather gloves must be worn at all times.

#### 4.2 General methods

All reagents were purchased from Energy chemical in analytical grade and were used as supplied, if not stated otherwise. The decomposition (onset) points were obtained on a differential scanning calorimeter (NETZSCH DSC 204 F1 Phoenix) at a scan rate of 5 °C min<sup>-1</sup> in closed Al containers with a high-purity nitrogen flow of 50 mL min<sup>-1</sup>. IR spectra were recorded on a Thermo Nicolet iS10 spectrometer equipped with a Thermo Scientific Smart iTR diamond ATR accessory. Elemental analyses were carried out on a vario EL

III CHNOS elemental analyzer. Powder X-ray diffraction (PXRD) measurements were performed on a Bruker D8 Advance X-ray diffractometer using Cu K $\alpha$  ( $\lambda = 1.5406 \text{ \AA}$ ) radiation.

### 4.3 X-ray crystallography

A colourless needle crystal of dimensions  $0.08 \times 0.05 \times 0.04 \text{ mm}^3$  was mounted on a Bruker Smart Apex-II diffractometer using Mo-K $\alpha$  radiation ( $\lambda = 0.71073 \text{ \AA}$ ) with a graphite monochromator at 100 K. An Oxford Cobra low-temperature device was used to maintain the low temperature. Integration and scaling of intensity data was accomplished using the SAINT program<sup>1</sup>. The structures were solved by intrinsic using SHELXT2015<sup>2</sup> and refinement was carried out by a full-matrix least-squares technique using SHELXL2014<sup>3</sup>. The hydrogen atoms were refined isotropically, and the heavy atoms were refined anisotropically. N-H and O-H hydrogens were located from different electron density maps. Data were corrected for the effects of absorption using SADABS<sup>4</sup>. Relevant crystal data and refinement results are summarized in Table S1.

### 4.4 Synthesis procedures

NaN<sub>5</sub> was synthesized according to our previously published procedures.<sup>5</sup>

[Na<sub>4</sub>(N<sub>5</sub>)<sub>4</sub>(H<sub>2</sub>O)<sub>2</sub>] $\cdot$ H<sub>2</sub>O $\cdot$ 2MeOH: 100 mg (1 mmol) NaN<sub>5</sub> was dissolved into the mixture of ammonia (2 M) in MeOH (5 mL) and H<sub>2</sub>O (3 mL) under ultrasonic. The mixture was then placed in the dark at ambient temperature for several days to obtain colorless crystals of [Na<sub>4</sub>(N<sub>5</sub>)<sub>4</sub>(H<sub>2</sub>O)<sub>2</sub>] $\cdot$ H<sub>2</sub>O $\cdot$ 2MeOH. Yield: 97.5 mg, 74 %. IR (ATR): 3616, 3392, 1613, 1394, 1230, 1007, 638 cm<sup>-1</sup>. Elem anal. Calcd (%) for C<sub>2</sub>H<sub>14</sub>Na<sub>4</sub>N<sub>20</sub>O<sub>5</sub> (MW = 490.228): C 4.90, N 57.14, H 2.88; Found: C 4.82, N 57.20, H 2.81.

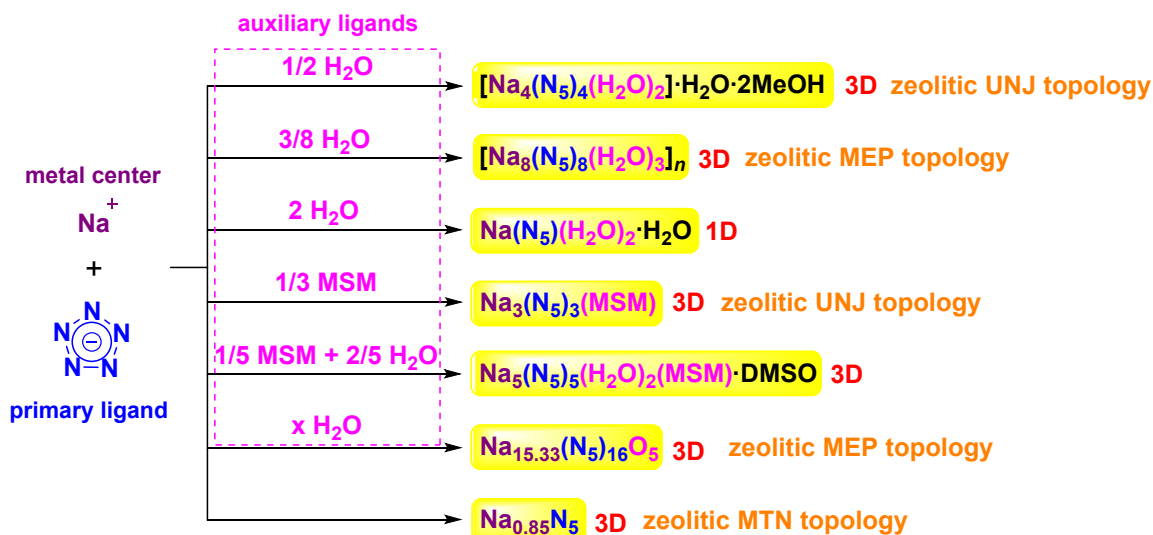

**Scheme S1** Syntheses of sodium-pentazolate-frameworks. MSM = (methylsulfonyl)methane; DMSO = dimethyl sulfoxide.

## 5. The theoretical simulation of the porosity of framework 1

The accessible surface area ( $S_{acc}$ ) and total free volume ( $V_{free}$ ) were calculated through the probes with a diameter of 0.364 nm and 0 nm, respectively (Fig. S6). The calculated BET surface area and the pore volume of framework **1** are  $614.3 \text{ m}^2 \text{ g}^{-1}$  and  $0.28 \text{ cm}^3 \text{ g}^{-1}$ , respectively. In addition, the pore total accessible volume of framework **1** is about 34.1% as calculated by *PLATON* program (see *ref. Acta Crystallogr., Sect. A: Found. Crystallogr.*, 1990, 46, C34).

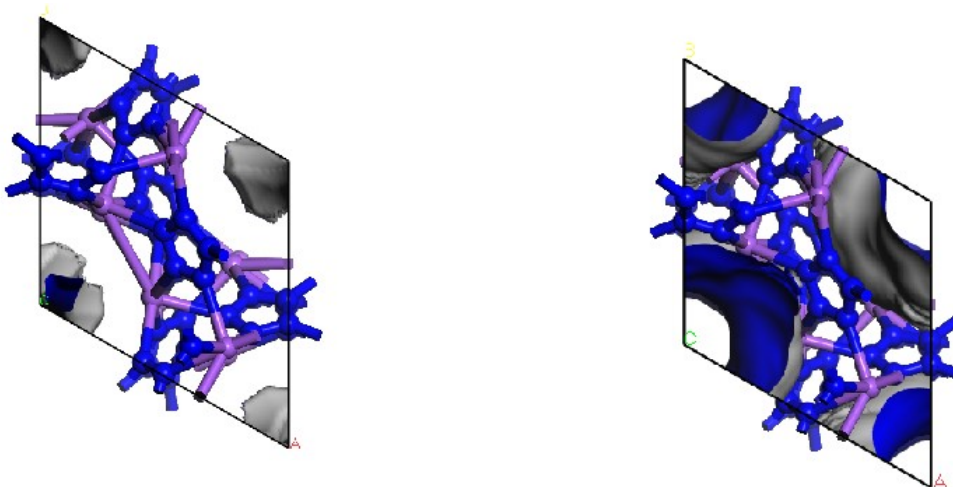

**Fig. S6** Visualization pores in framework **1** by probes of diameter 0.364 nm (left) and 0 nm (right). Computational results obtained using software programs from Dassault Systèmes BIOVIA. The accessible surface area and total free volume of each calculation was performed with the Atoms Volume & Surfaces, and graphical displays generated with BIOVIA Materials Studio (2017).

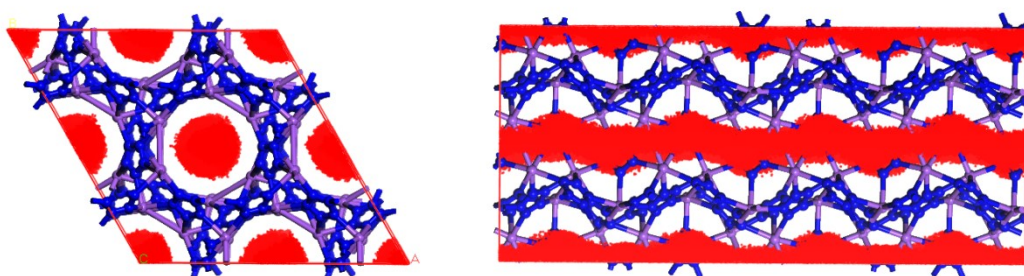

**Fig. S7** The calculated  $\text{N}_2$  absorption diagram of  $[\text{Na}_4(\text{N}_5)_4(\text{H}_2\text{O})_2] \cdot \text{H}_2\text{O} \cdot 2\text{MeOH}$  (the water molecules and methanol molecule were removed) at 1 atm and 273 K ( $2.58 \text{ mmol g}^{-1}$ ). The adsorption of  $\text{N}_2$  onto  $[\text{Na}_4(\text{N}_5)_4(\text{H}_2\text{O})_2] \cdot \text{H}_2\text{O} \cdot 2\text{MeOH}$  (the water molecules and methanol molecule were removed) was based on the Metropolis Monte Carlo method (N. Metropolis, A. W. Rosenbluth, M. N. Rosenbluth, A. H. Teller, E. Teller, *J. Chem. Phys.* 21 (1953) 1087–1092.) and was simulated using Sorption Module of Material Studio packages (2017). The graphical displays generated with BIOVIA Materials Studio (2017).

## 6. References

- 1 Bruker, *SAINTE* v8.34A, Bruker AXS Inc., Madison, Wisconsin, USA, 2013.
- 2 G. M. Sheldrick, *Acta Cryst.*, 2015, **C71**, 3-8.
- 3 G. M. Sheldrick, *Acta Cryst.*, 2015, **A71**, 3-8.
- 4 Bruker, *SADABS* v2014/5, Bruker AXS Inc., Madison, Wisconsin, USA, 2014.
- 5 Y. Xu, Q. Wang, C. Shen, Q. Lin, P. Wang and M. Lu, *Nature*, 2017, **549**, 78-81.
